# Supplementary material
Source: Springer Nature journal article supplement (https://www.springermedizin.de/resource/supplementary/12885_2010_2367_MOESM17_ESM.pdf/9461124)

**Percentages of ALDH1-positive cells**

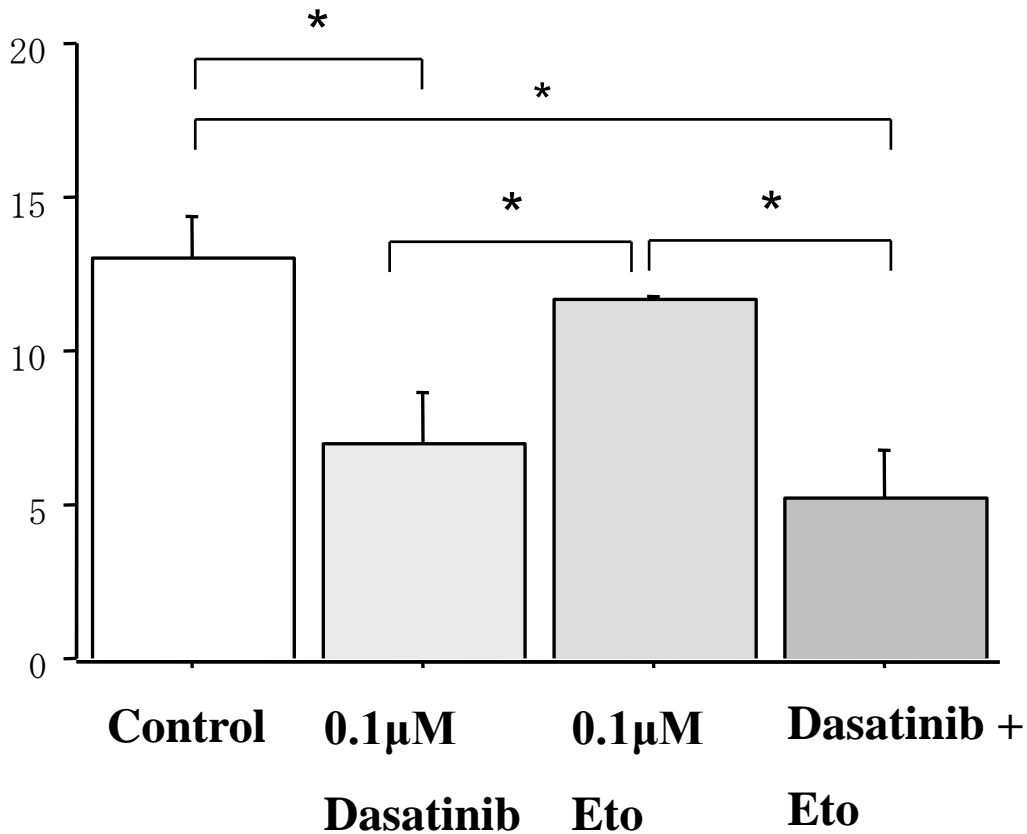

Supplement: MOESM17 [file 9461124]
